# Supplementary material for: Maternal Distress and Social Support Are Linked to Human Milk Immune Properties
Source: MDPI journal article supplement (doi:10.3390/nu13061857), 2021-05-29
Supplement: s1 [file s1]

## Supplementary Materials

Table S1: Correlation coefficients for the association between milk immunoactive factors (LF, SIgA, IgG, IgM) and potential confounding factors

|                       | LF    |       | lnSIgA |       | lnIgG |       | lnIgM |       |
|-----------------------|-------|-------|--------|-------|-------|-------|-------|-------|
|                       | r     | p     | r      | p     | r     | p     | r     | p     |
| Maternal age          | 0.02  | 0.804 | 0.09   | 0.382 | -0.03 | 0.751 | -0.18 | 0.070 |
| Maternal BMI          | 0.06  | 0.560 | 0.09   | 0.355 | 0.06  | 0.544 | 0.13  | 0.183 |
| Child age             | 0.17  | 0.08  | 0.11   | 0.275 | 0.17  | 0.075 | 0.03  | 0.764 |
| Gestational age       | 0.30  | 0.002 | 0.20   | 0.045 | 0.09  | 0.372 | 0.06  | 0.511 |
| Economic Satisfaction | 0.03  | 0.794 | 0.19   | 0.055 | 0.04  | 0.700 | 0.18  | 0.067 |
| Life Satisfaction     | -0.15 | 0.122 | 0.04   | 0.680 | 0.04  | 0.710 | 0.19  | 0.059 |
